# Supplementary material
Source: publisher site journal article supplement (https://www.dovepress.com/article/329629)
Supplement: Supplementary file 1 [file get_supplementary_file.php]

ORIGINAL RESEARCH

Rong Qiao et al

**Title: The Association Between *PNPLA2* Methylation in Peripheral Blood and Early-stage Lung Cancer in a Case-Control Study**

**Supplementary figure**

**Supplementary Figure 1** The MALDI-TOF mass spectrometry for the semi-quantitation of methylation analysis. (A) The principle of the T-cleavage assay. The Shrimp Alkaline Phosphatase treated PCR products were transcribed to RNA by T7 RNA polymerase, and then were cleaved to small fragments by RNase A, which made each fragment contain mostly only one CpG site. Therefore, each pair of fragments had only a mass difference between [guanine (G)](http://www.baidu.com/link?url=p7VZgt9e1sYpNORqKQU2Cl4kHPepZfEdrM8au6F5VlhxB0eetjbKNhO62sBWsAeuWpRitTmxe25Amg3zHnmTza) and adenine (A), or say, 16 Daltons. The relative amount of the methylated fragment versus the paired non-methylated fragment indicated the methylation levels of the CpG site in the fragment. (B) The representative figure of mass spectrometry for the illustration of methylation analysis. The semi-quantitative methylation level of each CpG site is determined by comparing the area under the peak of the methylated fragment and the paired non-methylated fragment.
